# Supplementary material for: Actein Inhibits the Proliferation and Adhesion of Human Breast Cancer Cells and Suppresses Migration in vivo
Source: PubMed Central journal article supplement (PMC6299023; doi:10.3389/fphar.2018.01466), 2018-12-12
Supplement: Image_1.pdf [file Image_1.pdf]

## Supplementary Figure

### **Actein inhibits the proliferation and adhesion of human breast cancer cells and suppresses migration *in vivo***

Xiao-Xiao Wu<sup>1,#</sup>, Grace Gar-Lee Yue<sup>2,3,#</sup>, Jin-Run Dong<sup>4,#</sup>, Christopher Wai-Kei Lam<sup>5</sup>, Chun-Kwok Wong<sup>1,2,3,6,\*</sup>, Ming-Hua Qiu<sup>4,\*</sup>, Clara Bik-San Lau<sup>2,3,\*</sup>

<sup>1</sup>Department of Chemical Pathology; <sup>2</sup>Institute of Chinese Medicine; <sup>3</sup>State Key Laboratory of Phytochemistry and Plant Resources in West China, The Chinese University of Hong Kong, Shatin, New Territories, Hong Kong SAR, China; <sup>4</sup>State Key Laboratory of Phytochemistry and Plant Resources in West China, Kunming Institute of Botany, Chinese Academy of Sciences, Kunming, China; <sup>5</sup>State Key Laboratory of Quality Research in Chinese Medicines, Macau Institute for Applied Research in Medicine and Health, Macau University of Science and Technology, Taipa, Macau; <sup>6</sup>Li Dak Sum Yip Yio Chin R & D Centre for Chinese Medicine, The Chinese University of Hong Kong, Hong Kong SAR, China.

#### **\*Corresponding authors**

Clara Bik-San LAU, Institute of Chinese Medicine, The Chinese University of Hong Kong, Shatin, New Territories, Hong Kong. Tel: +852 3943 6109, Fax: +852 2603 5248, E-mail: claralau@cuhk.edu.hk

Ming-Hua QIU, State Key Laboratory of Phytochemistry and Plant Resources in West China, Kunming Institute of Botany, Chinese Academy of Sciences, China. Tel : +86 871 6522 3257, Fax : +86 871 6522 3255, E-mail : mhchiu@mail.kib.ac.cn

Chun-Kwok WONG, Department of Chemical Pathology, Prince of Wales Hospital, Shatin, New Territories, Hong Kong. Tel: +852 3505 2964, Fax: +852 2636 5090, E-mail: ck-wong@cuhk.edu.hk

# These authors contributed equally to this work.

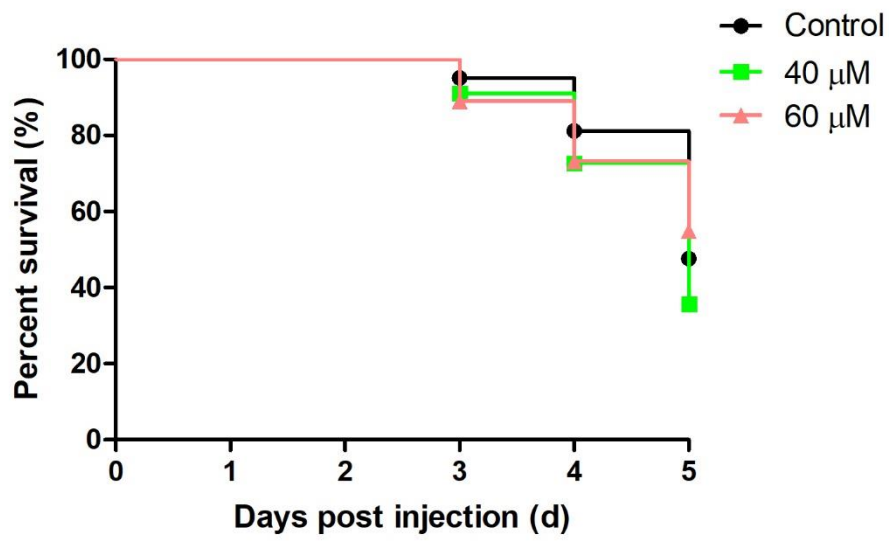

**Figure S1: Survival rate of embryos after treated with or without actein for the following 5 days.** Results were expressed as ratio of alive embryos per group in treated and vehicle-treated control of 4 independent experiments.
